# Supplementary material
Source: PubMed Central journal article supplement (PMC10061272)
Supplement: NIHMS1880616-supplement-Supp_Fig_1.pdf [file NIHMS1880616-supplement-Supp_Fig_1.pdf]

**Supplemental Figure 1. County-level percentage of population with fewer than two non-satellite<sup>a</sup> broadband (25/3 Mbps<sup>b</sup>) internet service providers.<sup>c</sup>**

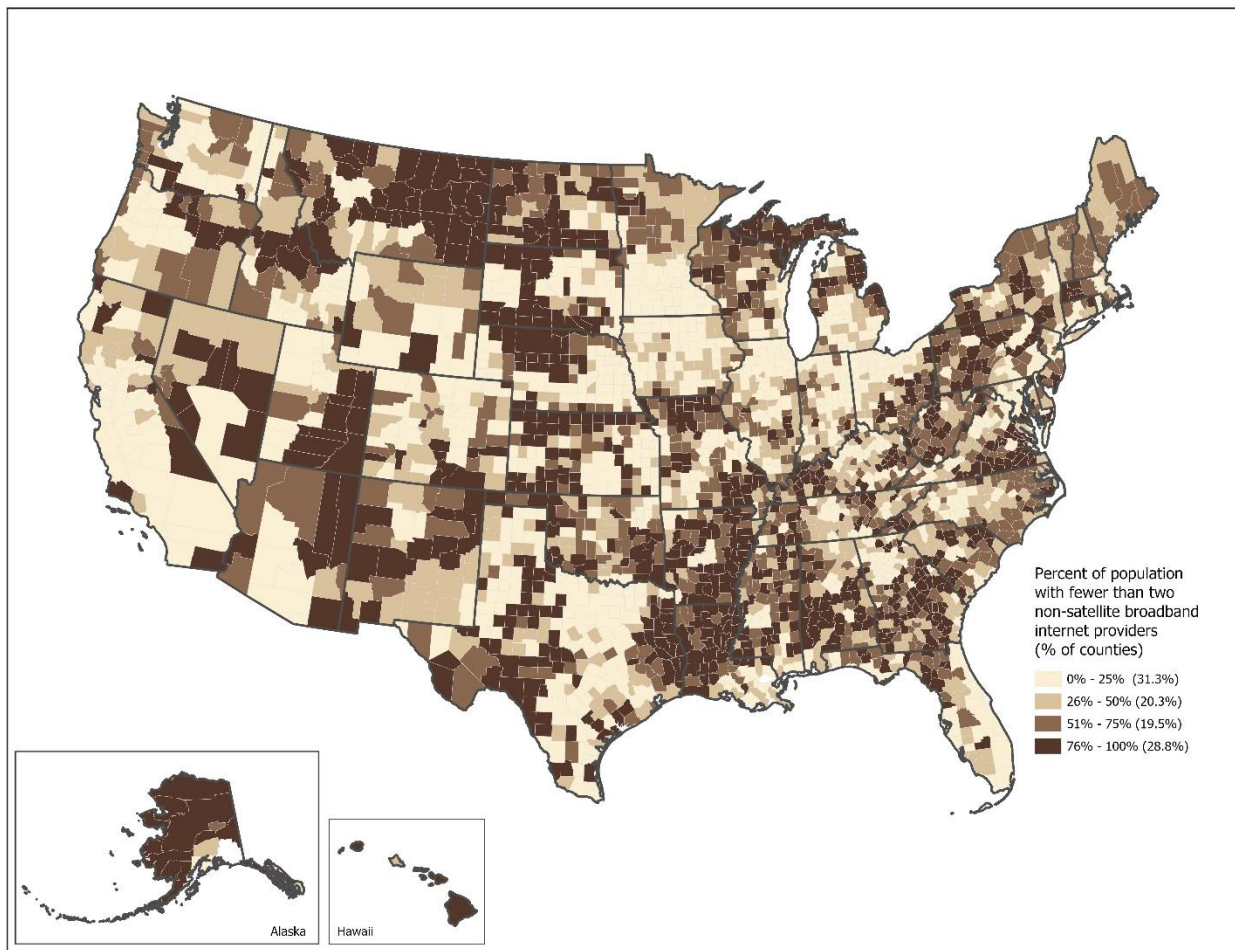

<sup>a</sup> Non-satellite includes ADSL, cable modem, FTTP, and fixed wireless.

<sup>b</sup> 25/3 Mbps = 25 Megabits per second download speed, 3 Megabits per second upload speed.

<sup>c</sup> FCC summary data of fixed broadband coverage by geographic area (2020).

<https://opendata.fcc.gov/Wireline/Area-Table-June-2020-V1/ktav-pd7>
